# Supplementary material
Source: MDPI journal article supplement (https://www.mdpi.com/2220-9964/8/7/307)
Supplement: s1 [file s1]

| <b>PRELIMINARY RISK ASSESSMENT</b>  |                                                                                                                                                                                                                       |           |  |                                         |           |       |
|-------------------------------------|-----------------------------------------------------------------------------------------------------------------------------------------------------------------------------------------------------------------------|-----------|--|-----------------------------------------|-----------|-------|
| <b>General information</b>          |                                                                                                                                                                                                                       |           |  |                                         |           |       |
| Date                                |                                                                                                                                                                                                                       |           |  | <i>Historical Information</i>           |           |       |
| Municipality                        |                                                                                                                                                                                                                       |           |  | Geohazard inventory                     | Y         | N     |
| Address                             |                                                                                                                                                                                                                       |           |  | Geomorphological Hazard                 | NO        | LOW   |
| Framework <sup>(1)</sup>            |                                                                                                                                                                                                                       |           |  |                                         | MED       | HIGH  |
| AP cause <sup>(2)</sup>             |                                                                                                                                                                                                                       |           |  | Previous field survey                   | Y         | N     |
| Coordinates                         |                                                                                                                                                                                                                       |           |  | Notes                                   |           |       |
| Surveyor                            |                                                                                                                                                                                                                       |           |  |                                         |           |       |
|                                     |                                                                                                                                                                                                                       |           |  |                                         |           |       |
| <b>Intensity</b>                    |                                                                                                                                                                                                                       |           |  |                                         |           |       |
| MP Density                          |                                                                                                                                                                                                                       |           |  | Building Cracks                         | Y         | N     |
| MP ascending velocity               |                                                                                                                                                                                                                       |           |  | Crack dimension                         | < 3mm     | > 3mm |
| MP descending velocity              |                                                                                                                                                                                                                       |           |  | Crack extension                         |           |       |
| AP distribution                     |                                                                                                                                                                                                                       |           |  | Ground fissure                          | Y         | N     |
| AP magnitude                        |                                                                                                                                                                                                                       |           |  | Geomorphological markers <sup>(3)</sup> |           |       |
| <b>I1</b>                           |                                                                                                                                                                                                                       | <b>I2</b> |  | <b>I3</b>                               | <b>I4</b> |       |
|                                     |                                                                                                                                                                                                                       |           |  |                                         |           |       |
| <b>Exposure</b>                     |                                                                                                                                                                                                                       |           |  |                                         |           |       |
| Structures                          |                                                                                                                                                                                                                       |           |  | Inhabitants                             | < 25      | > 25  |
| Infrastructure                      |                                                                                                                                                                                                                       |           |  | Strategic                               | Y         | N     |
| Geothermal area                     | Y                                                                                                                                                                                                                     | N         |  | Type <sup>(4)</sup>                     |           |       |
| Hydraulic work                      | Y                                                                                                                                                                                                                     | N         |  | Type <sup>(5)</sup>                     |           |       |
| Quarry site                         | Y                                                                                                                                                                                                                     | N         |  | Type <sup>(6)</sup>                     |           |       |
| Notes                               |                                                                                                                                                                                                                       |           |  |                                         |           |       |
| <b>E1</b>                           |                                                                                                                                                                                                                       | <b>E2</b> |  | <b>E3</b>                               | <b>E4</b> |       |
|                                     |                                                                                                                                                                                                                       |           |  |                                         |           |       |
| <b>Risk and related suggestions</b> |                                                                                                                                                                                                                       |           |  |                                         |           |       |
| <b>R1</b>                           | No particular precautions have to be taken.                                                                                                                                                                           |           |  |                                         |           |       |
| <b>R2</b>                           | Systematic field survey<br>Annual to monthly ground-base manual monitoring (e.g. extensimeter and crackmeter)<br>Soil bioengineering countermeasures for restoration of land effects                                  |           |  |                                         |           |       |
| <b>R3</b>                           | Systematic field survey<br>Weekly to daily ground-base manual monitoring (e.g. inclinometer, piezometer, rain gauge)<br>Environmental engineering countermeasures for restoration of land effects<br>Detailed studies |           |  |                                         |           |       |
| <b>R4</b>                           | Systematic field survey<br>Continuous ground-base monitoring (e.g. GB-InSAR, GPS topographical monitoring)<br>Environmental engineering countermeasures for restoration of land effects<br>Detailed studies           |           |  |                                         |           |       |
| Observations (if other):            |                                                                                                                                                                                                                       |           |  |                                         |           |       |

**(1) Framework:**

- forestry
- farming
- industrial
- urban
- other

**(2) AP cause:**

- slope instability (SI)
- areal subsidence (AS)
- local subsidence (LS)
- uplift (U)
- geothermal activity (GA)
- mining activity (MA)

**(3) Other elements area:**

- widespread water runoff
- gathered water runoff
- stagnant water
- spring
- ground settlement
- ground swelling
- counterslopes
- gibbosity
- other

**(4) Type geothermal area:**

- distribution network
- geothermal site
- extraction sites

**(5) Hydraulic works:**

- bridges
- steam
- dam
- anthropic lagoon

**(5) Quarry site:**

- yard area
- ravines

**Contingency matrix of Intensity and Exposure classes for the evaluation of the Risk**

|           |    | Exposition |    |    |    |
|-----------|----|------------|----|----|----|
|           |    | E1         | E2 | E3 | E4 |
| Intensity | I1 | R1         | R1 | R1 | R2 |
|           | I2 | R1         | R2 | R2 | R3 |
|           | I3 | R1         | R2 | R3 | R4 |
|           | I4 | R1         | R3 | R4 | R4 |
